# Supplementary material for: Understanding If Differences in Salivary Flow Rate and Total Protein Content Triggered by Biological Factors (Sex and Age) Affect Aroma Perception and the Hedonic and Emotional Response of Wine Consumers
Source: MDPI journal article supplement (doi:10.3390/foods11193104), 2022-10-05
Supplement: s1 [file s1]

Table S1: Emotion categories and feeling terms used in this study (in English and Spanish language).

| Categories                    | Terms                                                                                                    |
|-------------------------------|----------------------------------------------------------------------------------------------------------|
| SLEEPY <i>Adormilado</i>      | Adormilado                                                                                               |
| AFFECTIONATE <i>Afectuoso</i> | Afectuoso/Amoroso/ Cálido/Cariñoso/ Romántico                                                            |
| LUCKY <i>Afortunado</i>       | Afortunado/Agradecido/ Confortado                                                                        |
| JOYFUL <i>Alegre</i>          | Alegre/Contento/Feliz/ Ilusionado                                                                        |
| CHEERFUL <i>Animado</i>       | Amigable/Animado/Bien                                                                                    |
| CURIOUS <i>Curiosidad</i>     | Curiosidad                                                                                               |
| DESIROUS <i>Deseoso</i>       | Ansioso- deseoso/ Emocionado-entusiasmado/Excitado/<br>Placer/Sorprendido positivamente                  |
| DISPLEASED <i>Disgustado</i>  | Asqueado/Confuso/ Desagradado/<br>Descontento/Disgustado/Indiferencia/raro/ Sorprendido<br>negativamente |
| FUN <i>Divertido</i>          | Divertido/Enérgico/ Eufórico/Fiestero/Fuerte                                                             |
| NOSTALGIC <i>Nostálgico</i>   | Añoranza/Melancólico/ Nostálgico                                                                         |
| REFRESHED <i>Refrescado</i>   | Refrescado                                                                                               |
| RELAXED <i>Relajado</i>       | Calmado/Despreocupado/Relajado/ Sereno/ Tranquilo                                                        |
| SATISFIED <i>Satisfecho</i>   | Complacido/Satisfecho/ Seguro                                                                            |
| SENSITIVE <i>Sensible</i>     | Sensible                                                                                                 |
| SADNESS <i>Tristeza</i>       | Tristeza                                                                                                 |
